# Supplementary material for: Detection of hydrogen bonding in solution: A 2H nuclear magnetic resonance method based on rotational motion of a donor/acceptor complex
Source: Royal Society of Chemistry journal article supplement (doi:10.1039/b608147a), 2006-01-01
Supplement: b608147a.pdf [file b608147a.pdf]

## **Electronic Supplementary Information for:**

### **Detection of hydrogen bonding in solution: A $^2\text{H}$ nuclear magnetic resonance method based on rotational motion of a donor/acceptor complex**

Nathaniel K. Szymczak, Alan B. Oelkers, and David R. Tyler<sup>a</sup>

a: Department of Chemistry, 1253 University of Oregon, Eugene OR, USA Fax: 541-346-0487; Tel: 541-346-4649; E-mail: [dtyler@uoregon.edu](mailto:dtyler@uoregon.edu)

### **Table of contents**

**Table S1:** Estimated length of axes, shape, axial ratios, friction and shape factors for the modeled probe/solvent complexes.

**Figure S1:** Rotational correlation time calibration curve

**Table S1.** Estimated length of axes, shape, axial ratios, friction and shape factors for the modeled probe/solvent complexes.

| Solvent                       | x-axis | y-axis | z-axis | Shape   | Axial Ratio | C    | f    |
|-------------------------------|--------|--------|--------|---------|-------------|------|------|
| MeOH                          | 11.1   | 7.3    | 7.3    | Prolate | 0.66        | 0.44 | 1.02 |
| EtOH                          | 11.9   | 7.3    | 7.3    | Prolate | 0.61        | 0.53 | 1.02 |
| n-propanol                    | 13.4   | 7.3    | 7.3    | Prolate | 0.55        | 0.63 | 1.03 |
| n-butanol                     | 14.4   | 7.3    | 7.3    | Prolate | 0.51        | 0.72 | 1.04 |
| isobutanol                    | 13.4   | 7.3    | 7.3    | Prolate | 0.55        | 0.63 | 1.03 |
| isoamyl alcohol               | 14.4   | 7.3    | 7.3    | Prolate | 0.52        | 0.72 | 1.04 |
| p-isopropyl<br>benzyl alcohol | 13.9   | 7.3    | 7.3    | Prolate | 0.53        | 0.72 | 1.04 |

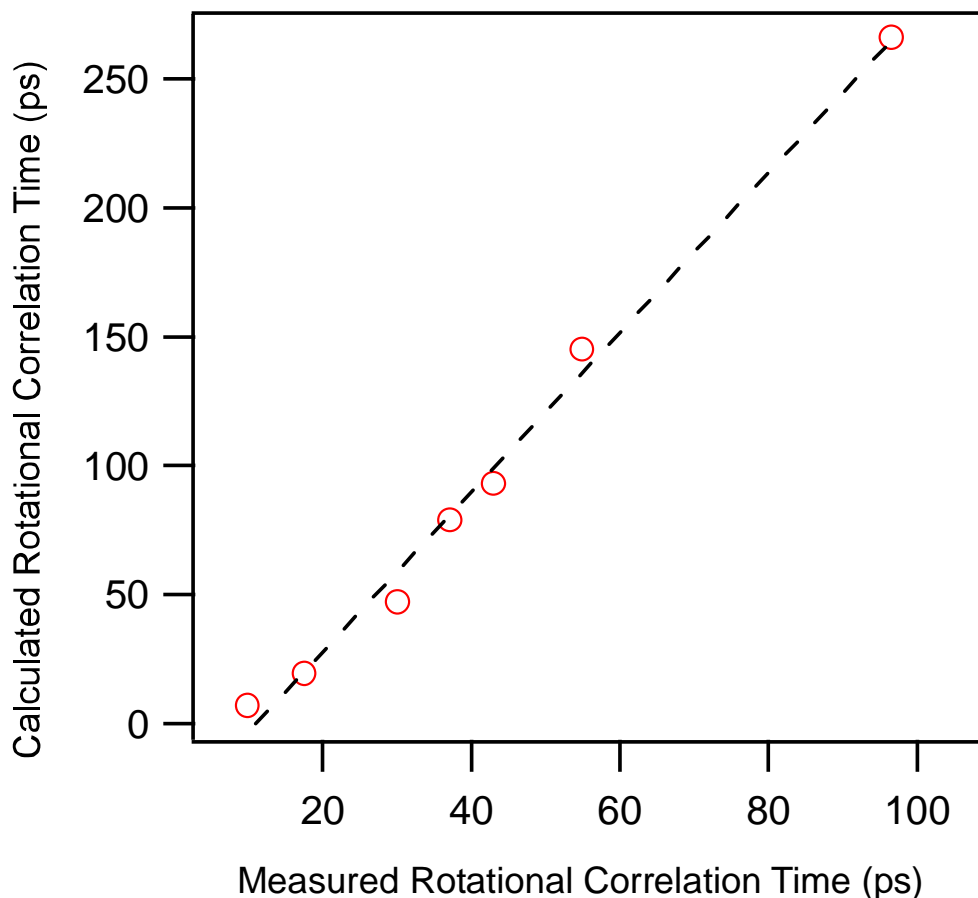

**Figure S1.** A comparison of the empirically measured rotational correlation times vs. those predicted from the SED model of probe/solvent complex. A linear relationship was found, and used to estimate the predicted correlation time (and hence hydrodynamic volume) of the probe/cholesterol complex. The linear equation derived from figure S1 is

$$\tau_{calc} = 3.1 \times \tau_{measured} - 35.$$
